# Supplementary material
Source: Springer Nature journal article supplement (https://www.springermedizin.de/resource/supplementary/12885_2013_4041_MOESM3_ESM.pdf/9464998)
Supplement: MOESM3 [file 9464998]

**Additional File 3. SAM analysis showing genes that were up or down regulated in BAP1-deficient stable cells when compared to control cells<sup>1</sup>**

| <b>Direction after BAP1 knockdown</b> | <b>Gene symbol</b> | <b>Gene name</b>                                                                        |
|---------------------------------------|--------------------|-----------------------------------------------------------------------------------------|
| Down                                  | CKMT1A             | creatine kinase, mitochondrial 1A                                                       |
| Down                                  | FNBP1L             | formin binding protein 1-like                                                           |
| Down                                  | GABARAPL2          | GABA(A) receptor-associated protein-like 2                                              |
| Down                                  | HECTD2             | HECT domain containing E3 ubiquitin protein ligase 2                                    |
| Down                                  | HNRNPH2            | heterogeneous nuclear ribonucleoprotein H2 (H')                                         |
| Down                                  | TNPO1              | transportin 1                                                                           |
| Up                                    | ANLN               | anillin, actin binding protein                                                          |
| Up                                    | ARPC2              | actin related protein 2/3 complex, subunit 2                                            |
| Up                                    | BNIP3L             | BCL2/adenovirus E1B 19kDa interacting protein 3-like                                    |
| Up                                    | BTF3               | basic transcription factor 3                                                            |
| Up                                    | C2orf80            | chromosome 2 open reading frame 80                                                      |
| Up                                    | CD68               | CD68 molecule                                                                           |
| Up                                    | CDK14              | cyclin-dependent kinase 14                                                              |
| Up                                    | CNIH               | cornichon homolog                                                                       |
| Up                                    | COMMD5             | COMM domain containing 5                                                                |
| Up                                    | DDX24              | DEAD (Asp-Glu-Ala-Asp) box polypeptide 24                                               |
| Up                                    | DNAJ17             | DnaJ (Hsp40) homolog, subfamily C, member 17                                            |
| Up                                    | ENDOG              | endonuclease G                                                                          |
| Up                                    | ENY2               | enhancer of yellow 2 homolog                                                            |
| Up                                    | EXOC7              | exocyst complex component 7                                                             |
| Up                                    | EXTL2              | exostoses (multiple)-like 2                                                             |
| Up                                    | F13B               | coagulation factor XIII, B polypeptide                                                  |
| Up                                    | FAM175B            | FAM175B family with sequence similarity 175                                             |
| Up                                    | FBXO18             | F-box protein, helicase, 18                                                             |
| Up                                    | FRRS1              | ferric-chelate reductase 1                                                              |
| Up                                    | H2AFY              | H2A histone family, member Y                                                            |
| Up                                    | JARID2             | jumonji, AT rich interactive domain                                                     |
| Up                                    | JOSD1              | Josephin domain containing 1                                                            |
| Up                                    | LAPTM4A            | lysosomal protein transmembrane 4 alpha                                                 |
| Up                                    | LMTK2              | lemur tyrosine kinase 2                                                                 |
| Up                                    | LSM12              | LSM12 homolog (S. cerevisiae)                                                           |
| Up                                    | MAPK1              | Mitogen-activated protein kinase 1                                                      |
| Up                                    | MBNL1              | muscleblind-like splicing regulator 1                                                   |
| Up                                    | MGC27345           | hypothetical protein MGC27345                                                           |
| Up                                    | MRFAP1L1           | Morf4 family associated protein 1-like 1                                                |
| Up                                    | MRPL40             | mitochondrial ribosomal protein L40                                                     |
| Up                                    | MRPL54             | mitochondrial ribosomal protein L54                                                     |
| Up                                    | MRPS17             | mitochondrial ribosomal protein S17                                                     |
| Up                                    | MRPS33             | mitochondrial ribosomal protein S33                                                     |
| Up                                    | MUC3A              | mucin 3A, cell surface associated                                                       |
| Up                                    | NDUFB6             | NADH dehydrogenase (ubiquinone) 1 beta subcomplex, 6                                    |
| Up                                    | NPRL3              | nitrogen permease regulator-like 3                                                      |
| Up                                    | NR2F1              | nuclear receptor subfamily 2, group F, member 1                                         |
| Up                                    | NRBP1              | nuclear receptor binding protein 1                                                      |
| Up                                    | OTUD4              | OTU domain containing 4                                                                 |
| Up                                    | PDIK1L             | PDLIM1 interacting kinase 1 like                                                        |
| Up                                    | PPHLN1             | periphilin 1                                                                            |
| Up                                    | PRPF4              | PRP4 pre-mRNA processing factor 4 homolog (yeast)                                       |
| Up                                    | RAC1               | ras-related C3 botulinum toxin substrate 1 (rho family, small GTP binding protein Rac1) |
| Up                                    | RBCK1              | RanBP-type and C3HC4-type zinc finger containing 1                                      |
| Up                                    | RBM28              | RNA binding motif protein 28                                                            |
| Up                                    | RBMY1J             | RNA binding motif protein, Y-linked, family 1, member J                                 |
| Up                                    | REXO1              | REX1, RNA exonuclease 1 homolog                                                         |
| Up                                    | RHBDL1             | rhomboid, veinlet-like 1 (Drosophila)                                                   |
| Up                                    | SARNP              | SAP domain containing ribonucleoprotein                                                 |
| Up                                    | SCAMP3             | secretory carrier membrane protein 3                                                    |
| Up                                    | SEC31A             | SEC31 homolog A (S. cerevisiae)                                                         |
| Up                                    | SF3B5              | splicing factor 3b, subunit 5, 10kDa                                                    |
| Up                                    | SNORD91A           | small nucleolar RNA, C/D box 91A                                                        |
| Up                                    | SNRPN              | small nuclear ribonucleoprotein polypeptide N                                           |
| Up                                    | UAP1               | UDP-N-acetylglucosamine pyrophosphorylase 1                                             |
| Up                                    | UBE2K              | UBE2K ubiquitin-conjugating enzyme E2K                                                  |
| Up                                    | UBE2O              | ubiquitin-conjugating enzyme E2O                                                        |
| Up                                    | UBL5               | ubiquitin-like 5                                                                        |
| Up                                    | USP21              | ubiquitin specific peptidase 21                                                         |
| Up                                    | WNT7B              | wingless-type MMTV integration site family, member 7B                                   |
| Up                                    | ZBTB7A             | Zinc finger and BTB domain containing 7A                                                |

<sup>1</sup>Genes with a false discovery rate under 10%
